# Supplementary material for: Thermal Treatment of Polyvinyl Alcohol for Coupling MoS2 and TiO2 Nanotube Arrays toward Enhancing Photoelectrochemical Water Splitting Performance
Source: MDPI journal article supplement (doi:10.3390/catal11070857), 2021-07-17
Supplement: s1 [file s1]

# Thermal Treatment of Polyvinyl Alcohol for Coupling MoS<sub>2</sub> and TiO<sub>2</sub> Nanotube Arrays Toward Enhancing Photoelectrochemical Water Splitting Performance

Truong-Tho Nguyen <sup>1,2,3</sup>, Thi Minh Cao <sup>1</sup>, Narmina O. Balayeva <sup>4,\*</sup> and Viet Van Pham <sup>2,3,\*</sup>

<sup>1</sup> Ho Chi Minh City University of Technology (HUTECH), 475A Dien Bien Phu Street, Binh Thanh District, Ho Chi Minh City, 700000, Vietnam

<sup>2</sup> Faculty of Materials Science and Technology, University of Science, VNU-HCM, 227 Nguyen Van Cu Street, District 5, Ho Chi Minh City, 700000, Vietnam

<sup>3</sup> Vietnam National University – Ho Chi Minh City, Thu Duc District, Ho Chi Minh City, 700000, Vietnam

<sup>4</sup> Institute of Technical Chemistry, Gottfried Wilhelm Leibniz University of Hannover, Callinstr. 5, D-30167 Hannover, Germany

\* Correspondence: authors: [pvviet@hcmus.edu.vn](mailto:pvviet@hcmus.edu.vn) (Viet Van Pham) and [balayeva@iftc.uni-hannover.de](mailto:balayeva@iftc.uni-hannover.de) (Narmina O. Balayeva)

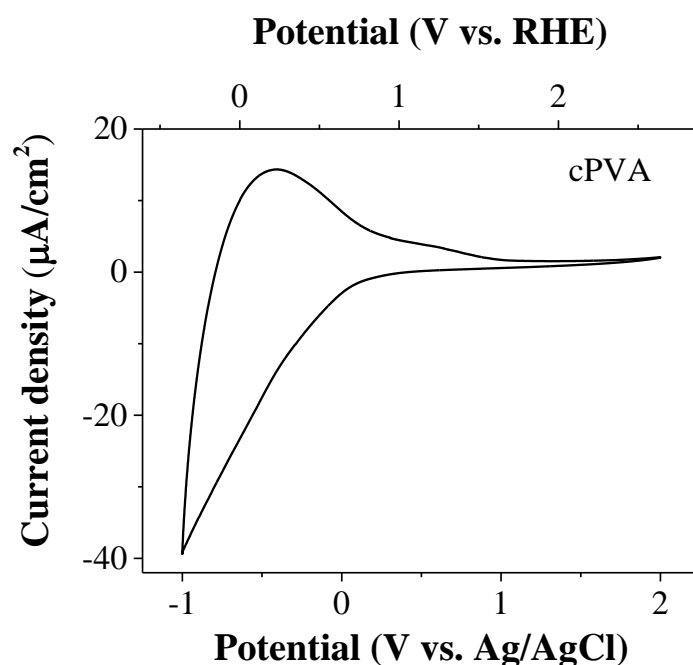

**Figure S1.** CV curve of cPVA under dark condition (Scan rate: 10 mV s<sup>-1</sup>)

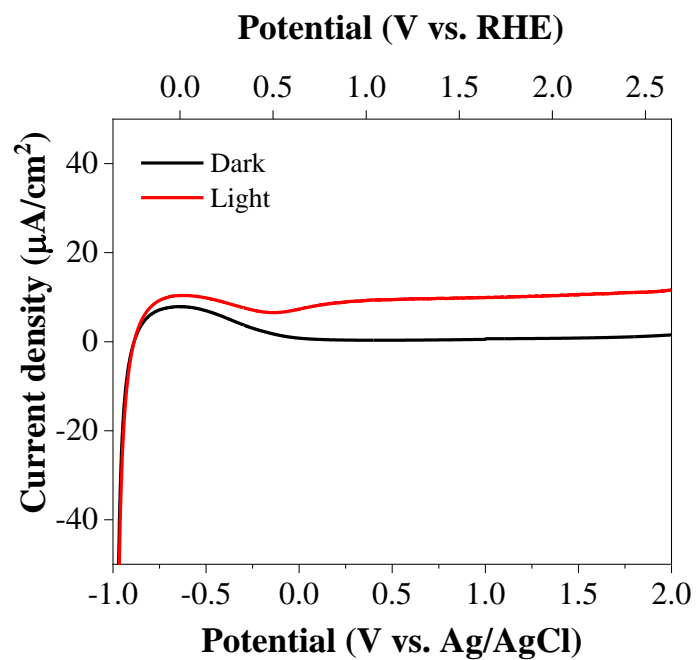

**Figure S2.** LSV of pristine cPVA in the dark and under visible light irradiation.

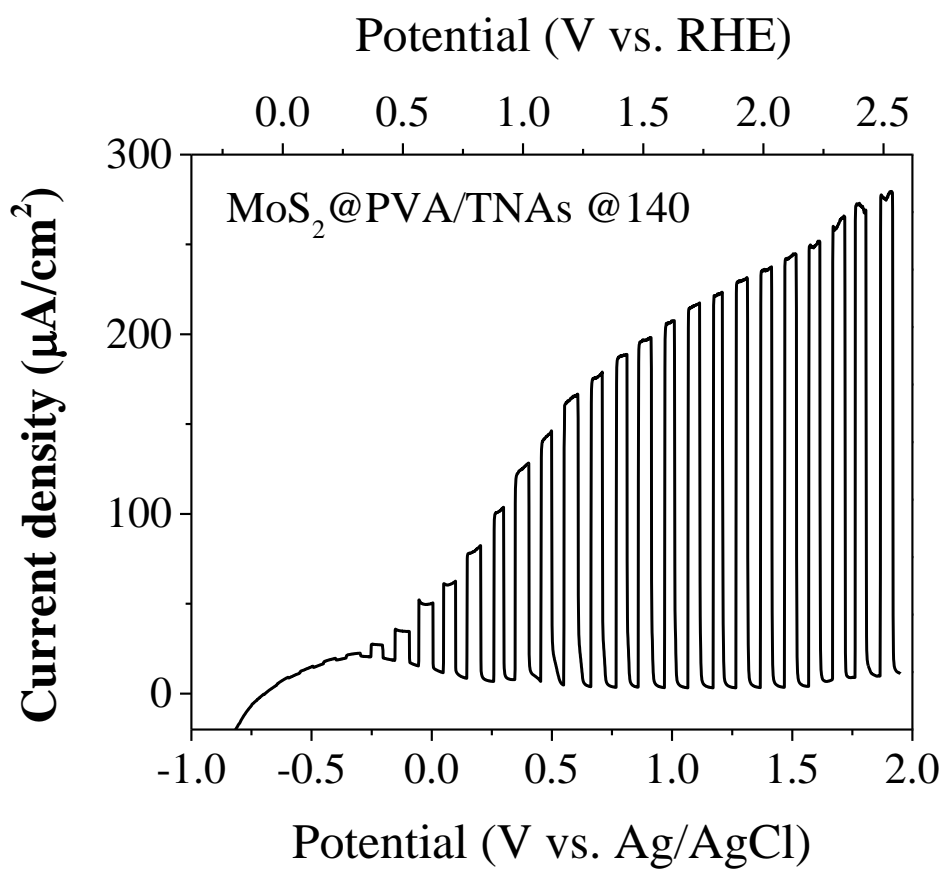

**Figure S3.** PEC window of  $\text{MoS}_2@\text{PVA}/\text{TNAs}@140$
